# Supplementary material for: Effects of Nitrogen on Photosynthetic Productivity and Yield Quality of Wheat (Triticum aestivum L.)
Source: MDPI journal article supplement (doi:10.3390/agronomy13061448), 2023-05-24
Supplement: s1 [file s1]

**Table S1.** Characteristics of nitrogen transport, and utilization efficiency in vegetative organs after anthesis.

| Year      | N Rate<br>( kg ha <sup>-1</sup> ) | NTAA<br>( kg ha <sup>-1</sup> ) | NTE<br>(%) | CNTAK<br>(%) | NGPE<br>( kg ha <sup>-1</sup> ) | NHI<br>(%) |
|-----------|-----------------------------------|---------------------------------|------------|--------------|---------------------------------|------------|
| 2019-2020 | N0                                | 62.61 c                         | 69.97 a    | 52.73 b      | 28.99 b                         | 81.54 a    |
|           | N120                              | 76.95 b                         | 70.62 a    | 55.10 ab     | 32.89 ab                        | 81.35 a    |
|           | N150                              | 91.08 a                         | 67.68 a    | 57.76 a      | 35.32 a                         | 78.38 b    |
|           | N210                              | 80.38 ab                        | 70.17 a    | 56.84 a      | 34.21 a                         | 80.54 ab   |
|           | Mean                              | 77.75                           | 69.61      | 55.61        | 32.85                           | 80.45      |
| 2020-2021 | N0                                | 63.53 b                         | 69.06 b    | 52.41 c      | 30.27 b                         | 80.99 b    |
|           | N120                              | 72.30 b                         | 68.49 b    | 55.93 b      | 36.65 a                         | 79.53 c    |
|           | N150                              | 109.89 a                        | 71.57 ab   | 62.97 a      | 34.92 a                         | 79.99 bc   |
|           | N210                              | 100.17 a                        | 72.69 a    | 56.33 b      | 33.25 ab                        | 82.53 a    |
|           | Mean                              | 86.47                           | 70.45      | 56.91        | 33.77                           | 80.76      |
| 2021-2022 | N0                                | 63.29 c                         | 74.05 a    | 56.10 bc     | 29.87 a                         | 83.57 a    |
|           | N120                              | 72.68 c                         | 69.30 c    | 57.72 b      | 32.02 a                         | 79.63 b    |
|           | N150                              | 94.51 a                         | 72.15 b    | 63.02 a      | 33.02 a                         | 80.43 b    |
|           | N210                              | 83.04 b                         | 69.46 c    | 53.98 c      | 30.20 a                         | 80.82 b    |
|           | Mean                              | 78.38                           | 71.24      | 57.71        | 31.28                           | 81.11      |
| Y         |                                   | **                              | *          | *            | *                               | ns         |
| N         |                                   | **                              | ns         | **           | **                              | **         |
| Y×N       |                                   | *                               | **         | **           | ns                              | *          |

Note: NTAA; Nitrogen translocation amount after anthesis; NTE; Nitrogen translocation efficiency; CNTAK; Contribution of nitrogen translocation amount to kernel; NGPE; Nitrogen grain production efficiency; NHI: Nitrogen harvest index. Within a column for each nitrogen rate, means followed by different lower-case letters are significantly different according to Tukey's HSD test (0.05). Within a column, upper-case letters indicate comparisons among two sowing method s. \* and \*\*, significant at 0.01 and 0.05 probability levels, respectively; ns, indicates not significant at 0.05 probability level.

**Table S2.** Effects of different nitrogen application on nitrogen use efficiency of winter wheat.

| Year      | N Rate<br>( kg ha <sup>-1</sup> ) | NAE<br>( kg ha <sup>-1</sup> ) | NPE<br>( kg ha <sup>-1</sup> ) | NUE<br>(%) |
|-----------|-----------------------------------|--------------------------------|--------------------------------|------------|
| 2019-2020 | N0                                | —                              | —                              | —          |
|           | N120                              | 16.54 b                        | 47.13 a                        | 18.86 b    |
|           | N150                              | 21.71 a                        | 42.11 a                        | 26.84 a    |
|           | N210                              | 10.28 c                        | 25.58 b                        | 10.86 c    |
|           | Mean                              | 16.18                          | 38.27                          | 18.85      |
| 2020-2021 | N0                                | —                              | —                              | —          |
|           | N120                              | 18.68 a                        | 52.6 a                         | 9.34 b     |
|           | N150                              | 21.57 a                        | 44.18 b                        | 26.86 a    |
|           | N210                              | 12.90 b                        | 29.86 c                        | 23.83 a    |
|           | Mean                              | 17.72                          | 42.21                          | 20.01      |
| 2021-2022 | N0                                | —                              | —                              | —          |
|           | N120                              | 13.19 b                        | 42.41 a                        | 16.75 b    |
|           | N150                              | 19.15 a                        | 38.63 a                        | 24.86 a    |
|           | N210                              | 9.66 c                         | 24.28 b                        | 20.05 ab   |
|           | Mean                              | 14.00                          | 35.11                          | 20.55      |
| Y         |                                   | **                             | **                             | ns         |
| N         |                                   | **                             | **                             | **         |
| Y×N       |                                   | ns                             | ns                             | **         |

**Note:** NUPE: N uptake efficiency; NUE: N use efficiency; NPE: Nitrogen partial productivity. Within a column for each nitrogen rate, means followed by different lower-case letters are significantly different according to Tukey's HSD test (0.05). Within a column, upper-case letters indicate comparisons among two sowing methods. \* and \*\*, significant at 0.01 and 0.05 probability levels, respectively; ns, indicates not significant at 0.05 probability level.
